# Supplementary material
Source: PubMed Central journal article supplement (PMC6551773)
Supplement: ASN.2018101007SupplementaryData1.pdf [file ASN.2018101007SupplementaryData1.pdf]

## **A Table of Contents**

**Supplementary Table 1.** Statistical models used in this study

**Supplementary Table 2.** Comparison of baseline characteristics between patients with and without missing data on the types of ESA

**Supplementary Table 3.** Comparison of baseline characteristics after propensity score-matching

**Supplementary Table 4.** The average dose of ESA in each ESA dose tertile

**Supplementary Table 5.** Baseline characteristics according to 4 types of ESA

**Supplementary Table 6.** Hazard ratios for deaths across the 4 types of ESA

**Supplementary Table 1. Statistical models used in this study**

| Models                         | Covariates                                                                                                                                                                                                                                                                                                                                                                                  |
|--------------------------------|---------------------------------------------------------------------------------------------------------------------------------------------------------------------------------------------------------------------------------------------------------------------------------------------------------------------------------------------------------------------------------------------|
| Cox proportional hazards model |                                                                                                                                                                                                                                                                                                                                                                                             |
| <i>Unadjusted</i>              | -                                                                                                                                                                                                                                                                                                                                                                                           |
| <i>Model 1</i>                 | age, sex, body mass index, pre-dialysis systolic blood pressure, dialysis duration, dialysis vintage, single-pool Kt/V, diabetes mellitus, a past history of cardiovascular diseases, laboratory data [albumin, urea nitrogen, C-reactive protein, hemoglobin, ferritin, albumin-adjusted calcium, phosphate, and intact parathyroid hormone], standardized erythropoietin resistance index |
| <i>Model 1'</i>                | Multiple imputation for all covariates in Model 1                                                                                                                                                                                                                                                                                                                                           |
| <i>Model 2</i>                 | Covariates in Model 1 + facility indicators                                                                                                                                                                                                                                                                                                                                                 |
| <i>Model 2'</i>                | Model 2 + facility size and region                                                                                                                                                                                                                                                                                                                                                          |
| <i>Model 3</i>                 | PS created from covariates in Model 1 + facility indicators                                                                                                                                                                                                                                                                                                                                 |
| <i>IPTW</i>                    | Covariates in Model 2                                                                                                                                                                                                                                                                                                                                                                       |
| <i>PS-matched</i>              | Covariates in Model 2                                                                                                                                                                                                                                                                                                                                                                       |
| <i>Subgroup analyses</i>       | Covariates in Model 2                                                                                                                                                                                                                                                                                                                                                                       |
| Instrumental variable analysis | Covariates in Model 2                                                                                                                                                                                                                                                                                                                                                                       |
| Facility-level analysis        | Covariates in Model 2                                                                                                                                                                                                                                                                                                                                                                       |

Abbreviations: IPTW, inverse probability of treatment weighting; PS, propensity score

**Supplement Table 2. Comparison of baseline characteristics between patients with and without missing data on the types of ESA**

|                                    | Study participants | Patients with<br>missing data | Standardized<br>difference |
|------------------------------------|--------------------|-------------------------------|----------------------------|
|                                    | n = 194,698        | n = 75,695                    |                            |
| age, yr                            | 67.5 (12.4)        | 67.5 (12.5)                   | <0.001                     |
| male, %                            | 61.6               | 63.6                          | 0.04                       |
| body mass index, kg/m <sup>2</sup> | 22.2 (3.9)         | 22.3 (3.9)                    | 0.02                       |
| HD vintage, yr                     | 6 [3, 11]          | 6 [3, 11]                     | 0.01                       |
| HD duration, hours/week            | 11.7 (1.8)         | 11.7 (1.8)                    | <0.001                     |
| single-pool Kt/V                   | 1.43 (0.32)        | 1.41 (0.33)                   | 0.08                       |
| pre-dialysis sBP, mmHg             | 152.1 (24.0)       | 150.2 (25.3)                  | 0.08                       |
| pre-dialysis dBp, mmHg             | 77.6 (14.4)        | 78.1 (15.2)                   | 0.04                       |
| urea nitrogen, mg/dL               | 61.9 (16.1)        | 62.6 (16.6)                   | 0.04                       |
| albumin, g/dL                      | 3.63 (0.44)        | 3.65 (0.45)                   | 0.05                       |
| C-reactive protein, mg/dL          | 0.1 [0.1, 0.4]     | 0.1 [0.1, 0.5]                | <0.001                     |
| albumin-adjusted Ca, mg/dL         | 9.22 (0.75)        | 9.21 (0.81)                   | 0.02                       |
| phosphate, mg/dL                   | 5.17 (1.44)        | 5.20 (1.51)                   | 0.02                       |
| intact PTH, pg/mL                  | 125 [66, 205]      | 130 [67, 216]                 | 0.06                       |
| hemoglobin, g/dL                   | 10.5 (1.2)         | 10.6 (1.5)                    | 0.06                       |
| ferritin, ng/mL                    | 80 [34, 169]       | 82 [32, 189]                  | 0.04                       |
| TSAT, %                            | 25.9 (13.3)        | 25.8 (13.3)                   | 0.01                       |
| diabetes mellitus, %               | 37.9               | 38.1                          | 0.003                      |

|                               |      |      |       |
|-------------------------------|------|------|-------|
| Past history of MI, %         | 9.2  | 11.5 | 0.08  |
| Past history of CH, %         | 5.7  | 7.2  | 0.06  |
| Past history of CI, %         | 17.9 | 21.6 | 0.095 |
| Past history of amputation, % | 3.3  | 4.8  | 0.08  |

Abbreviations: ESA, erythropoietin stimulating agents; HD, hemodialysis; sBP, systolic blood pressure; dBP, diastolic blood pressure; Ca, calcium; PTH, parathyroid hormone; TSAT, transferrin saturation; MI, myocardial infarction; CH, cerebral hemorrhage; CI, cerebral infarction.

Data presented as mean (standard deviation) or median [interquartile range]

Standardized difference of <0.1 denotes a negligible difference between groups.

**Supplement Table 3. Comparison of baseline characteristics after propensity score-matching**

|                                    | Long-acting ESA users | Short-acting ESA users | Standardized |
|------------------------------------|-----------------------|------------------------|--------------|
|                                    | n = 42,473            | n = 42,473             | difference   |
| age, yr                            | 67.0 (12.3)           | 67.1 (12.3)            | 0.009        |
| male, %                            | 61.9                  | 62.0                   | 0.001        |
| body mass index, kg/m <sup>2</sup> | 22.3 (3.6)            | 22.3 (3.6)             | 0.008        |
| HD vintage, yr                     | 6 [3, 11]             | 6 [3, 11]              | 0.006        |
| HD duration, hours/week            | 11.8 (1.7)            | 11.8 (1.6)             | 0.006        |
| single-pool Kt/V                   | 1.45 (0.31)           | 1.45 (0.31)            | <0.001       |
| pre-dialysis sBP, mmHg             | 152.3 (23.9)          | 152.2 (23.7)           | 0.002        |
| pre-dialysis dBP, mmHg             | 77.9 (14.4)           | 77.8 (14.3)            | 0.007        |
| urea nitrogen, mg/dL               | 62.1 (15.6)           | 61.9 (15.4)            | 0.007        |
| albumin, g/dL                      | 3.67 (0.40)           | 3.67 (0.40)            | 0.02         |
| C-reactive protein, mg/dL          | 0.1 [0.1, 0.4]        | 0.1 [0.1, 0.4]         | 0.003        |
| albumin-adjusted Ca, mg/dL         | 9.24 (0.73)           | 9.23 (0.73)            | 0.005        |
| phosphate, mg/dL                   | 5.17 (1.40)           | 5.16 (1.39)            | 0.006        |
| intact PTH, pg/mL                  | 125 [67, 202]         | 125 [67, 203]          | 0.005        |
| hemoglobin, g/dL                   | 10.5 (1.2)            | 10.5 (1.1)             | <0.001       |
| ferritin, ng/mL                    | 77 [33, 164]          | 87 [37, 178]           | 0.04         |
| TSAT, %                            | 26.1 (13.5)           | 25.6 (12.1)            | 0.03         |
| diabetes mellitus, %               | 38.1                  | 38.1                   | <0.001       |
| Past history of MI, %              | 9.6                   | 9.2                    | 0.01         |

|                               |      |      |      |
|-------------------------------|------|------|------|
| Past history of CH, %         | 5.8  | 5.5  | 0.01 |
| Past history of CI, %         | 17.6 | 18.1 | 0.01 |
| Past history of amputation, % | 3.2  | 2.9  | 0.02 |

---

Abbreviations: ESA, erythropoietin stimulating agents; HD, hemodialysis; sBP, systolic blood pressure; dBP, diastolic blood pressure; Ca, calcium; PTH, parathyroid hormone; TSAT, transferrin saturation; MI, myocardial infarction; CH, cerebral hemorrhage; CI, cerebral infarction.

Data presented as mean (standard deviation) or median [interquartile range].

Standardized difference of <0.1 denotes a negligible difference between groups.

**Supplement Table 4. The average dose of ESA in each ESA dose tertile**

|                               | ESA dose tertile |               |               | Total         |
|-------------------------------|------------------|---------------|---------------|---------------|
|                               | 1st              | 2nd           | 3rd           |               |
| Epoetin alfa/beta (U/week)    | 1,960 (854)      | 4,169 (1,041) | 7,618 (2,071) | 4,546 (2,786) |
| Darbepoetin alfa (µg/week)    | 12.0 (4.0)       | 24.9 (7.6)    | 56.1 (26.3)   | 30.4 (23.8)   |
| Epoetin beta pegol (µg/month) | 48.0 (18.9)      | 98.1 (24.2)   | 181.6 (65.4)  | 110.6 (69.5)  |
| Epoetin kappa (U/week)        | 1,965 (862)      | 4,214 (1,042) | 7,841 (2,144) | 4,991 (2,963) |

Abbreviations: ESAs, erythropoietin stimulating agents

Data presented as mean (standard deviation).

**Supplement Table 5. Baseline characteristics according to 4 types of ESA**

| Characteristics                    | Epoetin alfa/beta | Epoetin kappa  | Darbepoetin alfa | Epoetin beta pegol | P-value* |
|------------------------------------|-------------------|----------------|------------------|--------------------|----------|
|                                    | n = 50,809        | n = 19,822     | n = 97,391       | n = 26,676         |          |
| age, yr                            | 67.0 (12.4)       | 67.5 (12.5)    | 67.7 (12.3)      | 67.6 (12.4)        | <0.001   |
| male, %                            | 61.5              | 61.6           | 61.6             | 61.7               | 0.97     |
| body mass index, kg/m <sup>2</sup> | 22.3 (3.9)        | 22.3 (3.8)     | 22.2 (3.9)       | 22.3 (3.9)         | <0.001   |
| HD vintage, yr                     | 6 [3, 11]         | 5 [3, 10]      | 6 [3, 11]        | 6 [3, 11]          | <0.001   |
| HD duration, hours/week            | 11.9 (1.9)        | 11.7 (1.7)     | 11.7 (1.7)       | 11.7 (1.8)         | <0.001   |
| single-pool Kt/V                   | 1.44 (0.32)       | 1.42 (0.31)    | 1.42 (0.32)      | 1.44 (0.32)        | <0.001   |
| pre-dialysis sBP, mmHg             | 152.1 (23.8)      | 152.1 (23.8)   | 152.1 (24.1)     | 151.9 (24.2)       | 0.73     |
| pre-dialysis dBp, mmHg             | 77.8 (14.5)       | 77.3 (14.0)    | 77.5 (14.4)      | 77.6 (14.5)        | <0.001   |
| urea nitrogen, mg/dL               | 62.1 (15.8)       | 62.0 (16.0)    | 61.7 (16.3)      | 62.2 (16.0)        | <0.001   |
| albumin, g/dL                      | 3.65 (0.42)       | 3.67 (0.41)    | 3.60 (0.45)      | 3.63 (0.43)        | <0.001   |
| C-reactive protein, mg/dL          | 0.1 [0.1, 0.4]    | 0.1 [0.1, 0.4] | 0.1 [0.1, 0.5]   | 0.1 [0.1, 0.4]     | <0.001   |
| albumin-adjusted Ca, mg/dL         | 9.24 (0.75)       | 9.18 (0.75)    | 9.22 (0.75)      | 9.21 (0.76)        | <0.001   |
| phosphate, mg/dL                   | 5.16 (1.42)       | 5.12 (1.41)    | 5.17 (1.44)      | 5.21 (1.48)        | <0.001   |
| intact PTH, pg/mL                  | 126 [67, 206]     | 124 [65, 204]  | 125 [66, 206]    | 125 [65, 204]      | 0.013    |
| hemoglobin, g/dL                   | 10.5 (1.1)        | 10.4 (1.1)     | 10.5 (1.2)       | 10.4 (1.2)         | <0.001   |
| ferritin, ng/mL                    | 82 [35, 169]      | 98 [40, 212]   | 73 [31, 158]     | 89 [41, 177]       | <0.001   |
| TSAT, %                            | 25.7 (12.4)       | 26.0 (12.8)    | 25.4 (13.3)      | 28.5 (15.1)        | <0.001   |
| diabetes mellitus, %               | 37.3              | 39.2           | 38.1             | 37.5               | <0.001   |
| Past history of MI, %              | 9.0               | 9.5            | 9.3              | 9.0                | 0.071    |



|                               |      |      |      |      |        |
|-------------------------------|------|------|------|------|--------|
| Past history of CH, %         | 5.6  | 5.8  | 5.8  | 5.7  | 0.73   |
| Past history of CI, %         | 17.5 | 19.1 | 17.8 | 17.8 | <0.001 |
| Past history of amputation, % | 3.1  | 3.3  | 3.5  | 3.2  | <0.001 |

Abbreviations: ESA, erythropoietin stimulating agents; HD, hemodialysis; sBP, systolic blood pressure; dBP, diastolic blood pressure; Ca, calcium; PTH, parathyroid hormone, TSAT, transferrin saturation; MI, myocardial infarction; CH, cerebral hemorrhage; CI, cerebral infarction.

Data presented as mean (standard deviation) or median [interquartile range].

\*Analysis of variance or Kruskal-Wallis Test

**Supplement Table 6. Hazard ratios for deaths across the 4 types of ESA**

| <i>1) All-cause death</i>      |                    | n      | HR   | 95% CI       | P-value |
|--------------------------------|--------------------|--------|------|--------------|---------|
| Unadjusted                     | Epoetin alfa/beta  | 50,809 | 1.00 | -            | -       |
|                                | Epoetin kappa      | 19,822 | 1.09 | 1.04 to 1.14 | <0.001  |
|                                | Epoetin beta pegol | 26,676 | 1.15 | 1.11 to 1.19 | <0.001  |
|                                | Darbepoetin alfa   | 97,391 | 1.25 | 1.21 to 1.28 | <0.001  |
| Model 1                        | Epoetin alfa/beta  | 30,243 | 1.00 | -            | -       |
|                                | Epoetin kappa      | 12,497 | 1.06 | 1.00 to 1.12 | 0.044   |
|                                | Epoetin beta pegol | 16,038 | 1.12 | 1.07 to 1.18 | <0.001  |
|                                | Darbepoetin alfa   | 59,420 | 1.16 | 1.12 to 1.21 | <0.001  |
| Model 2                        | Epoetin alfa/beta  | 30,135 | 1.00 | -            | -       |
|                                | Epoetin kappa      | 12,477 | 1.07 | 1.01 to 1.13 | 0.014   |
|                                | Epoetin beta pegol | 16,013 | 1.11 | 1.06 to 1.17 | <0.001  |
|                                | Darbepoetin alfa   | 59,278 | 1.16 | 1.12 to 1.21 | <0.001  |
| IPTW                           | Epoetin alfa/beta  | 30,135 | 1.00 | -            | -       |
|                                | Epoetin kappa      | 12,477 | 1.09 | 1.03 to 1.16 | 0.004   |
|                                | Epoetin beta pegol | 16,013 | 1.12 | 1.06 to 1.18 | <0.001  |
|                                | Darbepoetin alfa   | 59,278 | 1.17 | 1.13 to 1.22 | <0.001  |
| <i>2) Cardiovascular death</i> |                    | n      | HR   | 95% CI       | P-value |
| Unadjusted                     | Epoetin alfa/beta  | 50,809 | 1.00 | -            | -       |
|                                | Epoetin kappa      | 19,822 | 1.03 | 0.96 to 1.11 | 0.36    |
|                                | Epoetin beta pegol | 26,676 | 1.15 | 1.09 to 1.22 | <0.001  |
|                                | Darbepoetin alfa   | 97,391 | 1.20 | 1.15 to 1.26 | <0.001  |
| Model 1                        | Epoetin alfa/beta  | 30,243 | 1.00 | -            | -       |
|                                | Epoetin kappa      | 12,497 | 0.97 | 0.89 to 1.07 | 0.56    |
|                                | Epoetin beta pegol | 16,038 | 1.10 | 1.02 to 1.19 | 0.017   |
|                                | Darbepoetin alfa   | 59,420 | 1.12 | 1.05 to 1.18 | <0.001  |
| Model 2                        | Epoetin alfa/beta  | 30,135 | 1.00 | -            | -       |
|                                | Epoetin kappa      | 12,477 | 0.99 | 0.91 to 1.09 | 0.87    |
|                                | Epoetin beta pegol | 16,013 | 1.09 | 1.01 to 1.18 | 0.028   |
|                                | Darbepoetin alfa   | 59,278 | 1.12 | 1.06 to 1.19 | <0.001  |
| IPTW                           | Epoetin alfa/beta  | 30,135 | 1.00 | -            | -       |
|                                | Epoetin kappa      | 12,477 | 0.99 | 0.90 to 1.09 | 0.90    |
|                                | Epoetin beta pegol | 16,013 | 1.10 | 1.01 to 1.19 | 0.027   |

|                                       |                    | Darbepoetin alfa | 59,278 | 1.12         | 1.06 to 1.19 | <0.001 |
|---------------------------------------|--------------------|------------------|--------|--------------|--------------|--------|
| <b>3) Death from cardiac diseases</b> |                    | n                | HR     | 95% CI       | P-value      |        |
| Unadjusted                            | Epoetin alfa/beta  | 50,809           | 1.00   | -            | -            |        |
|                                       | Epoetin kappa      | 19,822           | 1.05   | 0.97 to 1.13 | 0.24         |        |
|                                       | Epoetin beta pegol | 26,676           | 1.13   | 1.06 to 1.21 | <0.001       |        |
|                                       | Darbepoetin alfa   | 97,391           | 1.21   | 1.15 to 1.27 | <0.001       |        |
| Model 1                               | Epoetin alfa/beta  | 30,243           | 1.00   | -            | -            |        |
|                                       | Epoetin kappa      | 12,497           | 1.00   | 0.90 to 1.10 | 0.95         |        |
|                                       | Epoetin beta pegol | 16,038           | 1.07   | 0.98 to 1.17 | 0.142        |        |
|                                       | Darbepoetin alfa   | 59,420           | 1.12   | 1.05 to 1.20 | 0.001        |        |
| Model 2                               | Epoetin alfa/beta  | 30,135           | 1.00   | -            | -            |        |
|                                       | Epoetin kappa      | 12,477           | 1.02   | 0.92 to 1.13 | 0.74         |        |
|                                       | Epoetin beta pegol | 16,013           | 1.06   | 0.97 to 1.16 | 0.201        |        |
|                                       | Darbepoetin alfa   | 59,278           | 1.12   | 1.05 to 1.20 | <0.001       |        |
| IPTW                                  | Epoetin alfa/beta  | 30,135           | 1.00   | -            | -            |        |
|                                       | Epoetin kappa      | 12,477           | 1.02   | 0.92 to 1.13 | 0.70         |        |
|                                       | Epoetin beta pegol | 16,013           | 1.06   | 0.97 to 1.17 | 0.190        |        |
|                                       | Darbepoetin alfa   | 59,278           | 1.13   | 1.06 to 1.21 | <0.001       |        |
| <b>4) Death from strokes</b>          |                    | n                | HR     | 95% CI       | P-value      |        |
| Unadjusted                            | Epoetin alfa/beta  | 50,809           | 1.00   | -            | -            |        |
|                                       | Epoetin kappa      | 19,822           | 0.98   | 0.83 to 1.14 | 0.77         |        |
|                                       | Epoetin beta pegol | 26,676           | 1.24   | 1.08 to 1.41 | 0.002        |        |
|                                       | Darbepoetin alfa   | 97,391           | 1.18   | 1.07 to 1.30 | 0.001        |        |
| Model 1                               | Epoetin alfa/beta  | 30,243           | 1.00   | -            | -            |        |
|                                       | Epoetin kappa      | 12,497           | 0.89   | 0.72 to 1.08 | 0.24         |        |
|                                       | Epoetin beta pegol | 16,038           | 1.23   | 1.03 to 1.45 | 0.018        |        |
|                                       | Darbepoetin alfa   | 59,420           | 1.10   | 0.96 to 1.25 | 0.160        |        |
| Model 2                               | Epoetin alfa/beta  | 30,135           | 1.00   | -            | -            |        |
|                                       | Epoetin kappa      | 12,477           | 0.90   | 0.73 to 1.10 | 0.31         |        |
|                                       | Epoetin beta pegol | 16,013           | 1.22   | 1.03 to 1.44 | 0.021        |        |
|                                       | Darbepoetin alfa   | 59,278           | 1.10   | 0.97 to 1.25 | 0.142        |        |
| IPTW                                  | Epoetin alfa/beta  | 30,135           | 1.00   | -            | -            |        |
|                                       | Epoetin kappa      | 12,477           | 0.89   | 0.72 to 1.09 | 0.26         |        |
|                                       | Epoetin beta pegol | 16,013           | 1.22   | 1.03 to 1.45 | 0.020        |        |
|                                       | Darbepoetin alfa   | 59,278           | 1.10   | 0.97 to 1.25 | 0.135        |        |

| <b>5) <i>Non-cardiovascular death</i></b>       |                    | <b>n</b> | <b>HR</b> | <b>95% CI</b> | <b>P-value</b> |
|-------------------------------------------------|--------------------|----------|-----------|---------------|----------------|
| Unadjusted                                      | Epoetin alfa/beta  | 50,809   | 1.00      | -             | -              |
|                                                 | Epoetin kappa      | 19,822   | 1.12      | 1.07 to 1.19  | <0.001         |
|                                                 | Epoetin beta pegol | 26,676   | 1.15      | 1.09 to 1.21  | <0.001         |
|                                                 | Darbepoetin alfa   | 97,391   | 1.28      | 1.23 to 1.32  | <0.001         |
| Model 1                                         | Epoetin alfa/beta  | 30,243   | 1.00      | -             | -              |
|                                                 | Epoetin kappa      | 12,497   | 1.12      | 1.04 to 1.20  | 0.002          |
|                                                 | Epoetin beta pegol | 16,038   | 1.13      | 1.06 to 1.21  | <0.001         |
|                                                 | Darbepoetin alfa   | 59,420   | 1.20      | 1.14 to 1.25  | <0.001         |
| Model 2                                         | Epoetin alfa/beta  | 30,135   | 1.00      | -             | -              |
|                                                 | Epoetin kappa      | 12,477   | 1.13      | 1.05 to 1.21  | 0.001          |
|                                                 | Epoetin beta pegol | 16,013   | 1.13      | 1.06 to 1.20  | <0.001         |
|                                                 | Darbepoetin alfa   | 59,278   | 1.19      | 1.14 to 1.25  | <0.001         |
| IPTW                                            | Epoetin alfa/beta  | 30,135   | 1.00      | -             | -              |
|                                                 | Epoetin kappa      | 12,477   | 1.16      | 1.07 to 1.25  | <0.001         |
|                                                 | Epoetin beta pegol | 16,013   | 1.13      | 1.06 to 1.21  | <0.001         |
|                                                 | Darbepoetin alfa   | 59,278   | 1.20      | 1.15 to 1.27  | <0.001         |
| <b>6) <i>Death from infectious diseases</i></b> |                    | <b>n</b> | <b>HR</b> | <b>95% CI</b> | <b>P-value</b> |
| Unadjusted                                      | Epoetin alfa/beta  | 50,809   | 1.00      | -             | -              |
|                                                 | Epoetin kappa      | 19,822   | 1.09      | 0.99 to 1.19  | 0.089          |
|                                                 | Epoetin beta pegol | 26,676   | 1.21      | 1.11 to 1.31  | <0.001         |
|                                                 | Darbepoetin alfa   | 97,391   | 1.30      | 1.22 to 1.38  | <0.001         |
| Model 1                                         | Epoetin alfa/beta  | 30,243   | 1.00      | -             | -              |
|                                                 | Epoetin kappa      | 12,497   | 1.09      | 0.96 to 1.23  | 0.165          |
|                                                 | Epoetin beta pegol | 16,038   | 1.17      | 1.05 to 1.31  | 0.004          |
|                                                 | Darbepoetin alfa   | 59,420   | 1.18      | 1.09 to 1.28  | <0.001         |
| Model 2                                         | Epoetin alfa/beta  | 30,135   | 1.00      | -             | -              |
|                                                 | Epoetin kappa      | 12,477   | 1.11      | 0.98 to 1.25  | 0.098          |
|                                                 | Epoetin beta pegol | 16,013   | 1.17      | 1.05 to 1.30  | 0.005          |
|                                                 | Darbepoetin alfa   | 59,278   | 1.18      | 1.09 to 1.27  | <0.001         |
| IPTW                                            | Epoetin alfa/beta  | 30,135   | 1.00      | -             | -              |
|                                                 | Epoetin kappa      | 12,477   | 1.15      | 1.01 to 1.30  | 0.040          |
|                                                 | Epoetin beta pegol | 16,013   | 1.19      | 1.06 to 1.33  | 0.002          |
|                                                 | Darbepoetin alfa   | 59,278   | 1.19      | 1.10 to 1.30  | <0.001         |
| <b>7) <i>Death from malignancy</i></b>          |                    | <b>n</b> | <b>HR</b> | <b>95% CI</b> | <b>P-value</b> |

|            |                    |        |      |              |        |
|------------|--------------------|--------|------|--------------|--------|
| Unadjusted | Epoetin alfa/beta  | 50,809 | 1.00 | -            | -      |
|            | Epoetin kappa      | 19,822 | 1.07 | 0.93 to 1.23 | 0.36   |
|            | Epoetin beta pegol | 26,676 | 1.11 | 0.97 to 1.26 | 0.115  |
|            | Darbepoetin alfa   | 97,391 | 1.33 | 1.22 to 1.46 | <0.001 |
| Model 1    | Epoetin alfa/beta  | 30,243 | 1.00 | -            | -      |
|            | Epoetin kappa      | 12,497 | 1.06 | 0.88 to 1.27 | 0.54   |
|            | Epoetin beta pegol | 16,038 | 1.08 | 0.92 to 1.28 | 0.35   |
|            | Darbepoetin alfa   | 59,420 | 1.19 | 1.05 to 1.34 | 0.005  |
| Model 2    | Epoetin alfa/beta  | 30,135 | 1.00 | -            | -      |
|            | Epoetin kappa      | 12,477 | 1.06 | 0.88 to 1.27 | 0.56   |
|            | Epoetin beta pegol | 16,013 | 1.08 | 0.92 to 1.27 | 0.36   |
|            | Darbepoetin alfa   | 59,278 | 1.18 | 1.05 to 1.33 | 0.006  |
| IPTW       | Epoetin alfa/beta  | 30,135 | 1.00 | -            | -      |
|            | Epoetin kappa      | 12,477 | 1.08 | 0.89 to 1.30 | 0.45   |
|            | Epoetin beta pegol | 16,013 | 1.07 | 0.91 to 1.27 | 0.40   |
|            | Darbepoetin alfa   | 59,278 | 1.18 | 1.05 to 1.34 | 0.007  |

Abbreviations: ESA, erythropoietin stimulating agents; HR, hazard ratio; CI, confidence interval; IPTW, inverse probability of treatment weighting; -, not applicable.

Model 1 adjusted for age, sex, body mass index, pre-dialysis systolic blood pressure, dialysis duration, dialysis vintage, single-pool Kt/V, diabetes mellitus, a past history of cardiovascular diseases, laboratory data (albumin, urea nitrogen, C-reactive protein, hemoglobin, ferritin, albumin-adjusted calcium, phosphate, and parathyroid hormone), and standardized erythropoietin resistance index

Model 2 adjusted for covariates in Model 1 + facility indicators.

IPTW model was adjusted for covariates in Model 2
